# Supplementary material
Source: PubMed Central journal article supplement (PMC7241959)
Supplement: awz384_supplementary_data.pdf [file awz384_supplementary_data.pdf]

| Study                | N   | M   | Cohort             | Modality             | Initial Metric                         | Method                                      | AD dementia |     |          | MCI |     |     | CN         |          |     | Established Biomarkers | Other | CA  |                                               |                                                                                       |                                                                                                                |
|----------------------|-----|-----|--------------------|----------------------|----------------------------------------|---------------------------------------------|-------------|-----|----------|-----|-----|-----|------------|----------|-----|------------------------|-------|-----|-----------------------------------------------|---------------------------------------------------------------------------------------|----------------------------------------------------------------------------------------------------------------|
|                      |     |     |                    |                      |                                        |                                             | n           | m   | age      | sd  | n   | m   | age        | sd       | n   |                        |       |     | m                                             | age                                                                                   | sd                                                                                                             |
| Poulakis et al. 2018 | 627 | -   | ANM                | sMRI, T1, 3.0T       | brain volume - 162 ROIs<br>Freesurfer  | Random forest clustering                    | 299         | -   | 64 to 84 | -   | -   | -   | -          | 328      | 165 | 74.9                   | 3.4   | -   | <i>APOE</i>                                   | global cognition, dementia screen, memory, visuospatial, executive function, language |                                                                                                                |
|                      |     |     | ADNI               | sMRI, T1, 3.0T       |                                        |                                             |             |     |          |     |     |     |            |          |     |                        |       |     |                                               |                                                                                       |                                                                                                                |
| ten Kate et al. 2018 | 640 |     | ADCd               | sMRI, T1, 3.0T       | brain volume - 1024 equally-sized ROIs | non-negative matrix factorization           | 299         | 150 | 67       | 8   | 160 | 344 | 72         | 8        | -   | -                      | -     | -   | CSF Aβ42 or PET amyloid, CSF t-tau, CSF p-tau | <i>APOE</i> , WMH                                                                     | memory, language, visuospatial, attention / executive function                                                 |
|                      |     |     | ADCv               |                      |                                        |                                             | 181         | 86  | 66       | 7   |     |     |            |          | -   | -                      | -     | -   |                                               |                                                                                       |                                                                                                                |
|                      | 670 |     | ADNI               | sMRI, T1, 1.5, 3.0T  |                                        |                                             | 227         | 128 | 74       | 8   | 443 |     |            |          | -   | -                      | -     | -   |                                               |                                                                                       |                                                                                                                |
| Tam et al. 2018      | 605 |     | ADNI1              | sMRI, T1, 1.5T, 3.0T | grey matter density images, VBM        | hierarchical agglomerative cluster analysis | 165         | 80  | 75.4     | 7.5 | 235 | 139 | 74, 74.3   | 7.1, 7.6 | 205 | 99                     | 76.1  | 5   | CSF Aβ42, CSF t-tau, CSF p-tau                | <i>APOE</i>                                                                           | global cognition, memory, executive function, language, visuospatial                                           |
|                      | 512 |     | ADNI2              |                      |                                        |                                             | 89          | 48  | 74.4     | 7.8 | 235 | 122 | 70.8, 72.1 | 7.1, 7.3 | 188 | 86                     | 72.8  | 6.1 |                                               |                                                                                       |                                                                                                                |
| Dong et al. 2017     | 844 |     | ADNI1, ADNI - GO/2 | sMRI, T1, 1.5T, 3.0T | brain volume - 80 ROIs, RAVENS         | CHIMERA clustering                          | 314         | -   | -        | -   | 530 | -   | -          | -        | 399 | -                      | -     | -   | CSF Aβ42, CSF t-tau, CSF p-tau                | <i>APOE</i> , WMH                                                                     | -                                                                                                              |
| Hwang et al. 2016    | 77  | 43  | ADNI2              | sMRI, T1, 3.0T       | cortical thickness, CIVET              | hierarchical agglomerative cluster analysis | 77          | 43  | -        | -   | -   | -   | -          | -        | -   | -                      | -     | -   | -                                             | -                                                                                     | -                                                                                                              |
| Malpas 2016          | 369 | 187 | ADNI               | sMRI, T1             | cortical thickness, Freesurfer         | model-based clustering (MClust)             | 250*        | -   | -        | -   | -   | -   | -          | -        | 119 | -                      | -     | -   | -                                             | -                                                                                     | global cognition                                                                                               |
| Park et al. 2017     | 545 | 208 | SMC                | sMRI, T1, 3.0T       | cortical thickness, Freesurfer         | Louvain method based clustering             | 225         | 76  | 70.4     | 9   | -   | -   | -          | -        | 320 | 132                    | 70    | 7.9 | -                                             | <i>APOE</i>                                                                           | global cognition, dementia screen, episodic memory, executive function, verbal fluency, speed, semantic memory |

|                   |     |     |              |                |                                 |                                                                           |     |    |      |      |     |    |      |     |     |    |      |      |                                                         |                         |                                                        |
|-------------------|-----|-----|--------------|----------------|---------------------------------|---------------------------------------------------------------------------|-----|----|------|------|-----|----|------|-----|-----|----|------|------|---------------------------------------------------------|-------------------------|--------------------------------------------------------|
|                   | 289 | 148 | ADNI         | sMRI, T1, 1.5T |                                 |                                                                           | 131 | 74 | 74.1 | 7.4  | -   | -  | -    | -   | 158 | 74 | 76.2 | 5.4  |                                                         |                         |                                                        |
| Varol et al. 2017 | 300 | 151 | ADNI         | sMRI, T1, 1.5T | brain volume - 153 ROIs, RAVENS | HYDRA classification & clustering                                         | 123 | 61 | 74.7 | 7.39 | -   | -  | -    | -   | 177 | 90 | 75.9 | 5.18 | CSF A $\beta$ 42, CSF t-tau, CSF p-tau                  | <i>APOE</i> , GWAS SNPs | global cognition                                       |
| Dong et al. 2016  | 390 |     | ADNI         | sMRI, T1, 1.5T | brain volume - 80 ROIs, RAVENS  | CHIMERA clustering                                                        | 177 | -  | -    | -    | -   | -  | -    | -   | 213 | -  | -    | -    | -                                                       | <i>APOE</i>             | -                                                      |
| Zhang et al. 2016 | 810 |     | ADNI         | sMRI, T1, 1.5T | grey matter density images, VBM | bayesian model                                                            | 188 | -  | -    | -    | 394 | -  | -    | -   | 228 | -  | -    | -    | CSF A $\beta$ 42                                        | <i>APOE</i> , education | global cognition, memory, executive function           |
| Noh et al. 2014   | 224 | 72  | SMC          | sMRI, T1, 3.0T | cortical thickness, Freesurfer? | hierarchical agglomerative cluster analysis, Principle Component Analysis | 152 | 51 | 71.8 | 8.9  | -   | -  | -    | -   | 72  | 21 | 71.3 | 5.76 | CSF A $\beta$ 42, CSF t-tau, CSF p-tau, PET (AV45, FDG) | <i>APOE</i>             | attention, executive, language, memory, visuospatial   |
| Orban et al 2017  | 130 | 48  | MTL - ADNI2  | fMRI           | rsfMRI networks, NIAK           | hierarchical agglomerative cluster analysis                               | 65  | 24 | 72.7 | 7.9  | 65  | 24 | 72.7 | 7.9 | 65  | 24 | 72.6 | 7.3  | -                                                       | clinical symptoms       | global cognition, memory, language, executive function |
|                   | 231 | 59  | PREVENT - AD |                |                                 |                                                                           | -   | -  | -    | -    | -   | -  | -    | -   | 231 | 59 | 64.1 | 5.7  | CSF A $\beta$ 42, CSF t-tau, CSF p-tau                  | <i>APOE</i>             |                                                        |

**Table S1:** Characteristics of neuroimaging studies reporting data-driven subtypes. Age is provided as a mean, except for Poulakis et al., where age range is provided. Abbreviations in alphabetical order: AND, AddNeuroMed; APOE, apolipoprotein E; AV45, PET ligand florbetapir; CA, cognitive assessment; CSF, cerebrospinal fluid; FDG, fludeoxyglucose; fMRI, functional magnetic resonance imaging; GWAS, genome-wide association study; M, total number of males in study; m, number of males; N, total number of individuals in study; n, number of individuals; PET, positron emission tomography; p-tau, phosphorylated tau protein; ROI, region of interest; sMRI, structural magnetic resonance imaging; t-tau, total tau protein; T, magnet strength in tesla; VBM, voxel based morphometry.

| Study                    | N    | M  | Sample | Metabolites                                                                                                                                                            | AUC                                                                                                    | Method                                                                          | AD/dementia |     |      |     | MCI |     |      |      | CN  |    | Other notes | CA   |                                  |                            |
|--------------------------|------|----|--------|------------------------------------------------------------------------------------------------------------------------------------------------------------------------|--------------------------------------------------------------------------------------------------------|---------------------------------------------------------------------------------|-------------|-----|------|-----|-----|-----|------|------|-----|----|-------------|------|----------------------------------|----------------------------|
|                          |      |    |        |                                                                                                                                                                        |                                                                                                        |                                                                                 | n           | m   | age  | sd  | n   | m   | age  | sd   | n   | m  |             |      | age                              | sd                         |
| <i>Metabolite Panels</i> |      |    |        |                                                                                                                                                                        |                                                                                                        |                                                                                 |             |     |      |     |     |     |      |      |     |    |             |      |                                  |                            |
| Wang et al. 2014         | 172  | 74 | Plasma | differential metabolites: CN vs AD (31), CN vs aMCI (40)                                                                                                               | aMCI vs CN = 0.998 ; AD vs CN = 1.000                                                                  | UPLC time of flight MS & GS time of flight MS followed by PCA, PLS-DA & OPLS-DA | 57          | 24  | 74.2 | 9.1 | 58  | 25  | 71.7 | 10.4 | 57  | 25 | 75.5        | 10.2 | -                                | -                          |
| Liang et al. 2016        | 1243 | -  | Serum  | sphinganine 1 phosphate, 7 ketocholesterol, 3 methoxytyrosine, deoxyribose 5 phosphate, D phenyllactic acid, lysoPC(15:0), L phenylalanine, ornithine, L glutamic acid | sphinganine 1 phosphate + 7 ketocholesterol = 0.90                                                     | FUPLC MS followed by PCA and OPLS-DA                                            | 660         | 328 | 78.6 | 5.7 | 583 | 289 | 78.9 | 4.9  | -   | -  | -           | -    | -                                | -                          |
| Liang et al. 2015        | 474  | -  | Saliva | sphinganine 1 phosphate, ornithine, phenyllactic acid, inosine, 3 dehydrocarnitine, and hypoxanthine                                                                   | sphinganine 1 phosphate, ornithine & phenyllactic acid > 0.8                                           | FUPLC MS followed by PCA, PLS-DA, and OPLS-DA                                   | -           | -   | -    | -   | -   | -   | -    | -    | 218 | -  | -           | -    | -                                | -                          |
| Czech et al. 2012        | 130  | 59 | CSF    | 343 altered metabolites                                                                                                                                                | Highest discriminative AUC: 5 metabolites (uridine, cortisol, cysteine, serine, phenylalanine) = 0.845 | GS MS LC MS/MS, Solid phase extraction LC MS/MS followed by OPLS-DA             | 79          | 35  | 69.7 | 10  | -   | -   | -    | -    | 51  | 24 | 63.1        | 7.7  | -                                | global cognition, ADAS Cog |
| Figueira et al. 2016     | 139  | 46 | Saliva | 44 identified metabolite                                                                                                                                               | No AUC reported (acetic acid, histamine, propionatedimethyl sulfone, glycerol, taurine, succinate)     | NMR spectroscopy followed by PCA and OPLS-DA                                    | 45          | 14  | 75.3 | 5.5 | -   | -   | -    | -    | 94  | 32 | 75.4        | 5.4  | AD / dementia group included VaD | -                          |

|                                           |     |     |             |                                                                                                                                                                                                                                                                         |                                                                |                                                                                                                                                                      |     |    |      |     |     |    |      |     |     |     |      |     |                                                                         |   |
|-------------------------------------------|-----|-----|-------------|-------------------------------------------------------------------------------------------------------------------------------------------------------------------------------------------------------------------------------------------------------------------------|----------------------------------------------------------------|----------------------------------------------------------------------------------------------------------------------------------------------------------------------|-----|----|------|-----|-----|----|------|-----|-----|-----|------|-----|-------------------------------------------------------------------------|---|
| Mapstone et al. 2017                      | 224 | 86  | Plasma      | 12 differential metabolites: aspartate, hydroxy hexadecadienylcarnitine [C16:2-OH], 3 hydroxy palmitoleylcarnitine [C16:1-OH], lyso PC a C28:1, arginine, valerylcarnitine [C5], lyso PC a C17:0, asparagine, citrulline, nitrotyrosine, PC aa C38:5, histamine         | SN vs CN = 0.89; aMCI vs AD = 1.0; preclinical AD vs CN = 0.97 | LC/MS followed by LASSO                                                                                                                                              | 74  | 20 | 81.9 | 4.4 | -   | -  | -    | -   | 109 | 46  | 82.5 | 3.6 | superior memory performance group: n = 41, m = 20, age = 83.2, sd = 3.4 | - |
| <i>Metabolomics Pathways and Networks</i> |     |     |             |                                                                                                                                                                                                                                                                         |                                                                |                                                                                                                                                                      |     |    |      |     |     |    |      |     |     |     |      |     |                                                                         |   |
| Trushina et al. 2013                      | 45  | 33  | Plasma, CSF | 342 Plasma, 351 CSF                                                                                                                                                                                                                                                     | N/A                                                            | LC/MS-based non-targeted metabolomics followed by univariate statistical analysis                                                                                    | 15  | 12 | 82.7 | 4.2 | 15  | 11 | 80.4 | 4.2 | 15  | 10  | 78.6 | 3.5 | -                                                                       | - |
| Orešič et al. 2011                        | 226 | 85  | Serum       | 139 molecular lipids, 544 small polar metabolites                                                                                                                                                                                                                       | N/A                                                            | global lipidomics, based on UPLC MS Platform for global profiling of small polar metabolites, based on comprehensive two-dimensional GS coupled to time-of-flight MS | 37  | 17 | 75   | 4   | 143 | 47 | ~72  | ~6  | 46  | 21  | 71   | 6   | -                                                                       | - |
| Gonzalez - Dominquez et al. 2015          | 44  | 17  | Serum       | 23 altered metabolites                                                                                                                                                                                                                                                  | N/A                                                            | GS MS                                                                                                                                                                | 23  | 8  | 79.2 | 5.9 | -   | -  | -    | -   | 21  | 9   | 72.1 | 5.4 | medium age reported                                                     | - |
| Grahman et al. 2015                       | 72  | ~35 | Plasma      | 22 altered biochemical pathways                                                                                                                                                                                                                                         | N/A                                                            | MS, multivariate stats & pathway enrichment analysis                                                                                                                 | 19  | ~9 | -    | -   | 16  | 8  | -    | -   | 37  | ~18 | -    | -   | -                                                                       | - |
| de Leeuw et al. 2017                      | 248 | 129 | CSF         | -53 amine compounds, 22 organic acid compounds, 120 lipid compounds, 40 oxidative stress compounds. -26 differentially expressed metabolites. -Identified networks: tryosine, glycylglycine, glutamine, lysophosphatic acid C18:2, and platelet activating factor C16:0 | N/A                                                            | UPLC-tandem MC, nested linear models, logisitic regression, and network extraction                                                                                   | 127 | 64 | 65.1 | 9.1 | -   | -  | -    | -   | 121 | 65  | 62.7 | 8   | Also examined APOE ε4- and ε4+ differences                              | - |

---

Table S2: Characteristics of metabolomics studies included in review. Abbreviation: AUC, area under the curve; CA, Cognitive Assessment; FUPLC, faster ultra-performance liquid chromatography; GS, gas chromatography; LC, liquid chromatography; NMR, Nuclear magnetic resonance; MS, mass spectrometry; OPLS-DA, orthogonal projections to latent structures-discriminant analysis; PCA, principle component analysis; PLS-DA, partial least-squares-discrimination analysis; UPLC, ultra-performance liquid chromatography

| Last author, Year     | Biofluid in paper | Count - for Figure 2            | Metabolism Category - info from HMDB or KEGG or PubMed databases | KEGG COMPOUND ID | HMDB ID     | HMDB Database                                   |                                         |                                           |                                                                                                                                                                                                                            | LINK (HMDB or Other)                                                       |                                                                                                                                       |
|-----------------------|-------------------|---------------------------------|------------------------------------------------------------------|------------------|-------------|-------------------------------------------------|-----------------------------------------|-------------------------------------------|----------------------------------------------------------------------------------------------------------------------------------------------------------------------------------------------------------------------------|----------------------------------------------------------------------------|---------------------------------------------------------------------------------------------------------------------------------------|
|                       |                   |                                 |                                                                  |                  |             | Metabolite (HMDB common name)                   | SUPER CLASS                             | SUB CLASS                                 | BIOLOGICAL PROCESS (Biochemical pathway or other)                                                                                                                                                                          |                                                                            | BIOSPECIMEN (literature)                                                                                                              |
| Wang et al., 2014     | Plasma            | 1 plasma                        | nucleotide metabolism                                            | C00178           | HMDB0000262 | thymine                                         | Organoheterocyclic compounds            | Pyrimidines and pyrimidine derivatives    | <i>Biochemical pathway:</i> Pyrimidine Metabolism, MNGIE (Mitochondrial Neuroglycogen Intestinal Encephalopathy)                                                                                                           | blood, csf, feces, saliva, urine                                           | <a href="http://www.hmdb.ca/metabolites/HMDB0000262">http://www.hmdb.ca/metabolites/HMDB0000262</a>                                   |
| Wang et al., 2014     | Plasma            | 1 plasma                        | lipid metabolism                                                 | NA               | HMDB0000560 | 5,8-tetradecadienoic acid (Goshuyic acid)       | Lipids and lipid-like molecules         | Fatty acids and conjugates                | <i>Biochemical pathway:</i> Lipid metabolism pathway                                                                                                                                                                       | urine                                                                      | <a href="http://www.hmdb.ca/metabolites/HMDB0000560">http://www.hmdb.ca/metabolites/HMDB0000560</a>                                   |
| Wang et al., 2014     | Plasma            | 1 plasma                        | amino acid metabolism                                            | C01026           | HMDB0000092 | N,N-dimethylglycine (dimethylglycine)           | organic acids and derivatives           | Amino acids, peptides, and analogues      | <i>Biochemical pathway:</i> betaine metabolism, glycine and serine metabolism, methionine metabolism, sarcosine oncometabolite pathway                                                                                     | blood, feces, saliva, urine                                                | <a href="http://www.hmdb.ca/metabolites/HMDB0000092">http://www.hmdb.ca/metabolites/HMDB0000092</a>                                   |
| Wang et al., 2014     | Plasma            | 1 plasma                        | lipid metabolism                                                 | C00219           | HMDB0001043 | arachidonic acid                                | Lipids and lipid-like molecules         | Fatty acids and conjugates                | <i>Biochemical pathway:</i> Acetaminophen Action Pathway, Acetylsalicylic Acid Action Pathway, Alpha Linolenic Acid and Linoleic Acid Metabolism, Antipyrine Action Pathway, Antrafenine Action Pathway and plus           | blood, CSF, feces, saliva, urine                                           | <a href="http://www.hmdb.ca/metabolites/HMDB0001043">http://www.hmdb.ca/metabolites/HMDB0001043</a>                                   |
| Wang et al., 2014     | Plasma            | 3 (2 plasma, 1 serum)           | amino acid metabolism                                            | C00064           | HMDB0000641 | glutamine (L-Glutamine)                         | organic acids and derivatives           | amino acids, peptides, and analogues      | <i>Biochemical pathway:</i> Amino Sugar Metabolism, Ammonia Recycling, Aspartate Metabolism, Azathioprine Action Pathway, Glutamate Metabolism and plus                                                                    | blood, breast milk, CSF, feces, saliva, sweat, urine                       | <a href="http://www.hmdb.ca/metabolites/HMDB0000641">http://www.hmdb.ca/metabolites/HMDB0000641</a>                                   |
| Wang et al., 2014     | Plasma            | 2 (1 plasma, 1 serum)           | amino acid metabolism                                            | C00025           | HMDB0000148 | glutamic acid (L-Glutamic acid)                 | Organic acids and derivatives           | Amino acids, peptides, and analogues      | <i>Biochemical pathway:</i> Acetaminophen Action Pathway, Acetylsalicylic Acid Action Pathway, Alanine Metabolism, Amino Sugar Metabolism, Ammonia Recycling and plus                                                      | blood, cellular cytoplasm, csf, feces, saliva, sweat, urine                | <a href="http://www.hmdb.ca/metabolites/HMDB0000148">http://www.hmdb.ca/metabolites/HMDB0000148</a>                                   |
| Wang et al., 2014     | Plasma            | 1 plasma                        | amino acid metabolism                                            | C00956           | HMDB0000510 | 2-aminoadipic acid (Aminoadipic acid)           | Organic acids and derivatives           | Amino acids, peptides, and analogues      | <i>Biochemical pathway:</i> lysine degradation, pyridoxine dependency with seizures                                                                                                                                        | blood, feces, saliva, urine                                                | <a href="http://www.hmdb.ca/metabolites/HMDB0000510">http://www.hmdb.ca/metabolites/HMDB0000510</a>                                   |
| Wang et al., 2015     | Plasma            | 1 plasma                        | nucleotide metabolism                                            | C02961           | HMDB0000089 | cytidine                                        | Nucleosides, nucleotides, and analogues | NA                                        | <i>Biochemical pathway:</i> MNGIE, pyrimidine metabolism                                                                                                                                                                   | blood, breast milk, CSF, feces, saliva, urine                              | <a href="http://www.hmdb.ca/metabolites/HMDB0000089">http://www.hmdb.ca/metabolites/HMDB0000089</a>                                   |
| Mapstone et al., 2017 | Plasma            | 2 (1 plasma, 1 serum)           | amino acid metabolism                                            | C00152           | HMDB0000168 | asparagine (L-Asparagine)                       | Organic acids and derivatives           | Amino acids, peptides, and analogues      | <i>Biochemical pathway:</i> Amikacin Action Pathway, Ammonia Recycling, Adhekan Action Pathway, Aspartate Metabolism, Azithromycin Action Pathway and plus                                                                 | blood, breast milk, csf, feces, saliva, sweat, urine                       | <a href="http://www.hmdb.ca/metabolites/HMDB0000168">http://www.hmdb.ca/metabolites/HMDB0000168</a>                                   |
| Mapstone et al., 2017 | Plasma            | 1 plasma                        | lipid metabolism                                                 | C04230           | HMDB0012108 | lysoPC (17:0)                                   | Lipids and lipid-like molecules         | Glycerophosphocholines                    | <i>Biochemical pathway:</i> Glycerophospholipid metabolism, Lipid metabolism pathway                                                                                                                                       | blood, feces, urine                                                        | <a href="http://www.hmdb.ca/metabolites/HMDB0012108">http://www.hmdb.ca/metabolites/HMDB0012108</a>                                   |
| Mapstone et al., 2017 | Plasma            | 1 plasma                        | amino acid metabolism                                            | NA               | HMDB0001904 | nitrotyrosine (3-Nitrotyrosine)                 | Organic acids and derivatives           | Amino acids, peptides, and analogues      | <i>Pathologic process:</i> Oxidative stress                                                                                                                                                                                | blood, csf, urine                                                          | <a href="http://www.hmdb.ca/metabolites/HMDB0001904">http://www.hmdb.ca/metabolites/HMDB0001904</a>                                   |
| Mapstone et al., 2017 | Plasma            | 1 plasma                        | lipid metabolism                                                 | NA               | HMDB0013128 | valerylcarnitine                                | lipid and lipid-like molecules          | fatty acid esters                         | <i>Biochemical pathway:</i> Lipid metabolism pathway                                                                                                                                                                       | blood, CSF, feces, urine                                                   | <a href="http://www.hmdb.ca/metabolites/HMDB0013128">http://www.hmdb.ca/metabolites/HMDB0013128</a>                                   |
| Mapstone et al., 2017 | Plasma            | 2 (2 serum)                     | amino acid metabolism                                            | C00062           | HMDB0000517 | arginine (L-arginine)                           | organic acids and derivatives           | Amino acids, peptides, and analogues      | <i>Biochemical pathway:</i> lysinuric protein intolerance, arginine and proline metabolism, aspartate metabolism, glycine and serine metabolism, hypoaecylaspartia, transcriptoptranslaion, urea cycle                     | blood, CSF, feces, saliva, sweat, urine                                    | <a href="http://www.hmdb.ca/metabolites/HMDB0000517">http://www.hmdb.ca/metabolites/HMDB0000517</a>                                   |
| Mapstone et al., 2017 | Plasma            | 2 (1 serum, 1 saliva)           | amino acid metabolism                                            | C00388           | HMDB0000870 | histamine                                       | organic nitrogen compounds              | amines                                    | <i>Biochemical pathway:</i> Acrivastine H1-Antihistamine Action, Alcafladine H1-Antihistamine Action, Alimemazine H1-Antihistamine Action, Antazoline H1-Antihistamine Action, Astemizole H1-Antihistamine Action and plus | blood, CSF, feces, saliva, urine                                           | <a href="http://www.hmdb.ca/metabolites/HMDB0000870">http://www.hmdb.ca/metabolites/HMDB0000870</a>                                   |
| Mapstone et al., 2017 | Plasma            | 2 (1 plasma, 1 serum)           | amino acid metabolism                                            | C00049           | HMDB0000191 | aspartate (L-aspartic acid)                     | organic acids and derivatives           | Amino acids, peptides, and analogues      | <i>Biochemical pathway:</i> Ammonia Recycling, Arginine and Proline Metabolism, Aspartate Metabolism, Azathioprine Action Pathway, Beta-Alanine Metabolism                                                                 | blood, CSF, breast milk, feces, saliva, sweat, urine                       | <a href="http://www.hmdb.ca/metabolites/HMDB0000191">http://www.hmdb.ca/metabolites/HMDB0000191</a>                                   |
| Mapstone et al., 2017 | Plasma            | 1 plasma                        | amino acid metabolism                                            | C00327           | HMDB0000904 | citrulline                                      | organic acids and derivatives           | Amino acids, peptides, and analogues      | <i>Biochemical pathway:</i> Arginine and Proline Metabolism, Aspartate Metabolism, Hypoaecylaspartia, urea cycle                                                                                                           | blood, CSF, feces, saliva, sweat, urine                                    | <a href="http://www.hmdb.ca/metabolites/HMDB0000904">http://www.hmdb.ca/metabolites/HMDB0000904</a>                                   |
| Mapstone et al., 2017 | Plasma            | 1 plasma                        | lipid metabolism                                                 | NA               | NA          | Hydroxyheptadecadienylcarnitine (C16:2-OH)      | NA                                      | NA                                        | NA                                                                                                                                                                                                                         | NA                                                                         | <a href="http://www.lipidhome.co.uk/lipids/simple/carnitin/index.htm">http://www.lipidhome.co.uk/lipids/simple/carnitin/index.htm</a> |
| Mapstone et al., 2017 | Plasma            | 1 plasma                        | lipid metabolism                                                 | NA               | NA          | 3-Hydroxypalmitoleylcarnitine (C16:1-OH)        | NA                                      | NA                                        | NA                                                                                                                                                                                                                         | NA                                                                         | <a href="http://www.lipidhome.co.uk/lipids/simple/carnitin/index.htm">http://www.lipidhome.co.uk/lipids/simple/carnitin/index.htm</a> |
| Mapstone et al., 2017 | Plasma            | 1 plasma                        | lipid metabolism                                                 | NA               | HMDB002922  | Lyso PC a C28:1 (LysoPC(28:1(SZ)))              | Lipids and lipid-like molecules         | Glycerophosphocholines                    | <i>Biochemical pathway:</i> Phospholipid metabolism, Lipid transport, Lipid metabolism, Fatty acid metabolism                                                                                                              | Blood, Feces                                                               | <a href="http://www.hmdb.ca/metabolites/HMDB002922">http://www.hmdb.ca/metabolites/HMDB002922</a>                                     |
| Mapstone et al., 2017 | Plasma            | 1 plasma                        | lipid metabolism                                                 | C00157           | HMDB08306   | PC aa C38:5 (PC(20:1(11Z):18:4(6Z):9Z,12Z,15Z)) | NA                                      | NA                                        | <i>Biochemical pathway:</i> phosphatidylcholine biosynthesis, phosphatidylethanolamine biosynthesis, Glycerophospholipid metabolism, Lipid metabolism pathway                                                              | blood, feces, saliva, urine                                                | <a href="http://www.hmdb.ca/metabolites/HMDB008306">http://www.hmdb.ca/metabolites/HMDB008306</a>                                     |
| Liang et al., 2016    | Serum             | 3 (2 serum, 1 CSF)              | amino acid metabolism                                            | C00079           | HMDB0000159 | L-phenylalanine                                 | Organic acids and derivatives           | Amino acids, peptides, and analogues      | <i>Biochemical pathway:</i> Phenylalanine and Tyrosine Metabolism, Transcription/Translation                                                                                                                               | blood, breastmilk, csf, feces, saliva, sweat, urine                        | <a href="http://www.hmdb.ca/metabolites/HMDB0000159">http://www.hmdb.ca/metabolites/HMDB0000159</a>                                   |
| Liang et al., 2016    | Serum             | 1 serum                         | lipid metabolism                                                 | NA               | HMDB0000501 | 7-ketocholesterol                               | Lipids and lipid-like molecules         | Cholestanes steroids                      | <i>Biochemical pathway:</i> Lipid metabolism pathway                                                                                                                                                                       | blood, csf                                                                 | <a href="http://www.hmdb.ca/metabolites/HMDB0000501">http://www.hmdb.ca/metabolites/HMDB0000501</a>                                   |
| Liang et al., 2016    | Serum             | 1 serum                         | amino acid metabolism                                            | NA               | HMDB0001434 | 3-methoxytyrosine                               | Organic acids and derivatives           | Amino acids, peptides, and analogues      | NA                                                                                                                                                                                                                         | blood, csf, urine                                                          | <a href="http://www.hmdb.ca/metabolites/HMDB0001434">http://www.hmdb.ca/metabolites/HMDB0001434</a>                                   |
| Liang et al., 2016    | Serum             | 1 serum                         | carbohydrate metabolism (not added)                              | C00673           | HMDB0001031 | deoxyribose-5-phosphate                         | Organic oxygen compounds                | Carbohydrates and carbohydrate conjugates | <i>Biochemical pathway:</i> Pentose Phosphate Pathway                                                                                                                                                                      | NA                                                                         | <a href="http://www.hmdb.ca/metabolites/HMDB0001031">http://www.hmdb.ca/metabolites/HMDB0001031</a>                                   |
| Liang et al., 2016    | Serum             | 1 serum                         | lipid metabolism                                                 | C04230           | HMDB0010381 | lysoPC (15:0)                                   | Lipids and lipid-like molecules         | Glycerophosphocholines                    | <i>Biochemical pathway:</i> Glycerophospholipid metabolism, Lipid metabolism pathway                                                                                                                                       | blood                                                                      | <a href="http://www.hmdb.ca/metabolites/HMDB0010381">http://www.hmdb.ca/metabolites/HMDB0010381</a>                                   |
| Liang et al., 2016    | Serum             | already counted                 | amino acid metabolism                                            | C00025           | HMDB0000148 | L-glutamic acid                                 | Organic acids and derivatives           | Amino acids, peptides, and analogues      | <i>Biochemical pathway:</i> Acetaminophen Action Pathway, Acetylsalicylic Acid Action Pathway, Alanine Metabolism, Amino Sugar Metabolism, Ammonia Recycling and plus                                                      | blood, cellular cytoplasm, csf, feces, saliva, sweat, urine                | <a href="http://www.hmdb.ca/metabolites/HMDB0000148">http://www.hmdb.ca/metabolites/HMDB0000148</a>                                   |
| Liang et al., 2016    | Serum             | 2 (isurum, 1 saliva)            | lipid metabolism                                                 | C01120           | HMDB0001383 | sphinganine-1-phosphate                         | Lipids and lipid-like molecules         | Phosphosphingolipids                      | <i>Biochemical pathway:</i> Globoid Cell Leukodystrophy, Metachromatic Leukodystrophy (MLD), Sphingolipid Metabolism, Lipid metabolism pathway                                                                             | blood                                                                      | <a href="http://www.hmdb.ca/metabolites/HMDB0001383">http://www.hmdb.ca/metabolites/HMDB0001383</a>                                   |
| Liang et al., 2016    | Serum             | 4 (2 serum, 1 plasma, 1 saliva) | amino acid metabolism                                            | C00077           | HMDB0000214 | ornithine                                       | Organic acids and derivatives           | Amino acids, peptides, and analogues      | <i>Biochemical pathway:</i> Lysinuric protein intolerance, Arginine and Proline Metabolism, Glycine and Serine Metabolism, Spermidine and Spermine Biosynthesis, urea cycle                                                | blood, csf, feces, saliva, sweat, urine                                    | <a href="http://www.hmdb.ca/metabolites/HMDB0000214">http://www.hmdb.ca/metabolites/HMDB0000214</a>                                   |
| Liang et al., 2016    | Serum             | 2 (1 serum, 1 saliva)           | amino acid metabolism                                            | C01479           | HMDB0000779 | p-phenyllactic acid (phenyllactic acid)         | Phenylpropanoids and polyketides        | NA                                        | NA                                                                                                                                                                                                                         | blood, feces, saliva, urine                                                | <a href="http://www.hmdb.ca/metabolites/HMDB0000779">http://www.hmdb.ca/metabolites/HMDB0000779</a>                                   |
| Liang et al., 2015    | Saliva            | already counted                 | lipid metabolism                                                 | C01120           | HMDB0001383 | sphinganine-1-phosphate                         | Lipids and lipid-like molecules         | Phosphosphingolipids                      | <i>Biochemical pathway:</i> Globoid Cell Leukodystrophy, Metachromatic Leukodystrophy (MLD), Sphingolipid Metabolism, Lipid metabolism pathway                                                                             | blood                                                                      | <a href="http://www.hmdb.ca/metabolites/HMDB0001383">http://www.hmdb.ca/metabolites/HMDB0001383</a>                                   |
| Liang et al., 2015    | Saliva            | already counted                 | amino acid metabolism                                            | C00077           | HMDB0000214 | ornithine                                       | Organic acids and derivatives           | Amino acids, peptides, and analogues      | <i>Biochemical pathway:</i> Lysinuric protein intolerance, Arginine and Proline Metabolism, Glycine and Serine Metabolism, Spermidine and Spermine Biosynthesis, urea cycle                                                | blood, csf, feces, saliva, sweat, urine                                    | <a href="http://www.hmdb.ca/metabolites/HMDB0000214">http://www.hmdb.ca/metabolites/HMDB0000214</a>                                   |
| Liang et al., 2015    | Saliva            | already counted                 | amino acid metabolism                                            | C01479           | HMDB0000779 | phenyllactic acid                               | Phenylpropanoids and polyketides        | NA                                        | NA                                                                                                                                                                                                                         | blood, feces, saliva, urine                                                | <a href="http://www.hmdb.ca/metabolites/HMDB0000779">http://www.hmdb.ca/metabolites/HMDB0000779</a>                                   |
| Liang et al., 2015    | Saliva            | 1 saliva                        | nucleotide metabolism                                            | C00262           | HMDB0000157 | hypoxanthine                                    | Organoheterocyclic compounds            | Purines and purine derivatives            | <i>Biochemical pathway:</i> Azathioprine Action Pathway, Mercaptopurine Action Pathway, Purine Metabolism, Thioguanine Action Pathway                                                                                      | breast milk, cellular cytoplasm, csf, feces, saliva, urine                 | <a href="http://www.hmdb.ca/metabolites/HMDB0000157">http://www.hmdb.ca/metabolites/HMDB0000157</a>                                   |
| Liang et al., 2015    | Saliva            | 1 saliva                        | nucleotide metabolism                                            | C00294           | HMDB0000195 | inosine                                         | Nucleosides, nucleotides, and analogues | NA                                        | <i>Biochemical pathway:</i> Azathioprine Action Pathway, Mercaptopurine Action Pathway, Purine Metabolism, Thioguanine Action Pathway                                                                                      | blood, cellular cytoplasm, csf, feces, pericardial effusion, saliva, urine | <a href="http://www.hmdb.ca/metabolites/HMDB0000195">http://www.hmdb.ca/metabolites/HMDB0000195</a>                                   |
| Liang et al., 2015    | Saliva            | 1 saliva                        | lipid metabolism                                                 | NA               | HMDB0012154 | 3-dehydrocarnitine                              | Organic acids and derivatives           | Short-chain keto acids and derivatives    | NA                                                                                                                                                                                                                         | feces, saliva, urine                                                       | <a href="http://www.hmdb.ca/metabolites/HMDB0012154">http://www.hmdb.ca/metabolites/HMDB0012154</a>                                   |
| Figueira et al., 2016 | Saliva            | 1 serum                         | lipid, amino acid and carbohydrate metabolism                    | C00033           | HMDB0000042 | acetic acid                                     | organic acids and derivatives           | carboxylic acids                          | <i>Biochemical pathway:</i> Amino Sugar Metabolism, Aspartate Metabolism, Disulfiram Action Pathway, Ethanol Degradation, Fatty Acid Biosynthesis and plus                                                                 | blood, breast milk, CSF, feces, saliva, urine                              | <a href="http://www.hmdb.ca/metabolites/HMDB0000042">http://www.hmdb.ca/metabolites/HMDB0000042</a>                                   |

|                                 |              |                          |                                         |                        |                                   |                                                                                 |                                         |                                      |                                                                                                                                                                                                                                                                   |                                                                   |                                                                                                                       |
|---------------------------------|--------------|--------------------------|-----------------------------------------|------------------------|-----------------------------------|---------------------------------------------------------------------------------|-----------------------------------------|--------------------------------------|-------------------------------------------------------------------------------------------------------------------------------------------------------------------------------------------------------------------------------------------------------------------|-------------------------------------------------------------------|-----------------------------------------------------------------------------------------------------------------------|
| Figueira et al., 2016           | Saliva       | already counted          | amino acid metabolism                   | <a href="#">C00388</a> | HMDB0000870                       | histamine                                                                       | organic nitrogen compounds              | amines                               | <i>Biochemical pathway:</i> Acrivastine H1-Antihistamine Action, Alcaftadine H1-Antihistamine Action, Alimemazine H1-Antihistamine Action, Amazoline H1-Antihistamine Action, Astemizole H1-Antihistamine Action and plus                                         | blood, CSF, feces, saliva, urine                                  | <a href="http://www.hmdb.ca/metabolites/HMDB0000870">http://www.hmdb.ca/metabolites/HMDB0000870</a>                   |
| Figueira et al., 2016           | Saliva       | 1 serum                  | carbohydrate metabolism (not added)     | <a href="#">C00163</a> | HMDB0000237                       | propionate (propionic acid)                                                     | organic acids and derivatives           | carboxylic acids                     | <i>Biochemical pathway:</i> Propanoate Metabolism, Vitamin K Metabolism                                                                                                                                                                                           | urine, feces, saliva, blood, CSF                                  | <a href="http://www.hmdb.ca/metabolites/HMDB0000237">http://www.hmdb.ca/metabolites/HMDB0000237</a>                   |
| Figueira et al., 2016           | Saliva       | 1 serum                  | energy metabolism (not added)           | <a href="#">C11142</a> | HMDB0004983                       | dimethyl sulfone                                                                | organosulfur compounds                  | sulfones                             | NA                                                                                                                                                                                                                                                                | blood, CSF, saliva, urine                                         | <a href="http://www.hmdb.ca/metabolites/HMDB0004983">http://www.hmdb.ca/metabolites/HMDB0004983</a>                   |
| Figueira et al., 2016           | Saliva       | 1 serum                  | lipid metabolism                        | <a href="#">C00116</a> | HMDB0000131                       | glycerol                                                                        | organic oxygen compounds                | carb and carb conjugates             | <i>Biochemical pathway:</i> D-glyceric aciduria, Galactose metabolism, Glycerolipid metabolism                                                                                                                                                                    | blood, CSF, feces, saliva, sweat, urine                           | <a href="http://www.hmdb.ca/metabolites/HMDB0000131">http://www.hmdb.ca/metabolites/HMDB0000131</a>                   |
| Figueira et al., 2016           | Saliva       | 1 serum                  | amino acid metabolism                   | <a href="#">C00245</a> | HMDB0000251                       | taurine                                                                         | organic acids and derivatives           | organosulfonic acids and derivatives | <i>Biochemical pathway:</i> bile acid biosynthesis, Cerebrotendinous Xanthomatosis (CTX), Congenital Bile Acid Synthesis Defect Type II, Congenital Bile Acid Synthesis Defect Type III, Taurine and hypotaurine metabolism                                       | blood, breast milk, CSF, feces, saliva, urine                     | <a href="http://www.hmdb.ca/metabolites/HMDB0000251">http://www.hmdb.ca/metabolites/HMDB0000251</a>                   |
| Figueira et al., 2016           | Saliva       | 1 serum                  | amino acid, lipid and energy metabolism | <a href="#">C00042</a> | HMDB0000254                       | succinate (succinic acid)                                                       | organic acids and derivatives           | dicarboxylic acids and derivatives   | <i>Biochemical pathway:</i> Arginine and Proline Metabolism, Butyrate Metabolism, Carnitine Synthesis, Citric Acid Cycle, Congenital lactic acidosis and plus                                                                                                     | blood, breast milk, CSF, feces, saliva, sweat, urine              | <a href="http://www.hmdb.ca/metabolites/HMDB0000254">http://www.hmdb.ca/metabolites/HMDB0000254</a>                   |
| Czech et al., 2012              | CSF          | 1 CSF                    | nucleotide metabolism                   | <a href="#">C00299</a> | HMDB0000296                       | uridine                                                                         | Nucleosides, nucleotides, and analogues | na                                   | <i>Biochemical pathway:</i> MNGIE (Mitochondrial Neurogastrointestinal Encephalopathy), Pyrimidine Metabolism                                                                                                                                                     | Feces<br>Urine<br>Blood<br>Breast milk<br>Cerebrospinal fluid     | <a href="http://www.hmdb.ca/metabolites/HMDB0000296">http://www.hmdb.ca/metabolites/HMDB0000296</a>                   |
| Czech et al., 2012              | CSF          | 1 CSF                    | lipid metabolism pathway                | <a href="#">C00735</a> | HMDB0000063                       | cortisol                                                                        | lipid and lipid-like molecules          | hydrocysteroids                      | <i>Biochemical pathway:</i> Rheumatoid arthritis, Congenital Lipoid Adrenal Hyperplasia (CLAH) or Lipoid CAH, Corticotropin Activation of Cortisol Production, Steroidogenesis, Lipid metabolism pathway                                                          | blood, CSF, saliva, urine                                         | <a href="http://www.hmdb.ca/metabolites/HMDB0000063">http://www.hmdb.ca/metabolites/HMDB0000063</a>                   |
| Czech et al., 2012              | CSF          | 1 CSF                    | amino acid metabolism                   | <a href="#">C00097</a> | HMDB0000574                       | cysteine (L-Cysteine)                                                           | organic acids and derivatives           | amino acids, peptides, and analogues | <i>Biochemical pathway:</i> Amiloride Action Pathway, Bendroflumethiazide Action Pathway, Bumetanide Action Pathway, Chlorothalidone Action Pathway, Chlorthalidone Action Pathway and plus                                                                       | blood, CSF, feces, saliva, sweat, urine                           | <a href="http://www.hmdb.ca/metabolites/HMDB0000574">http://www.hmdb.ca/metabolites/HMDB0000574</a>                   |
| Czech et al., 2012              | CSF          | counted earlier          | amino acid metabolism                   | <a href="#">C00079</a> | HMDB0000159                       | phenylalanine (L-phenylalanine)                                                 | Organic acids and derivatives           | Amino acids, peptides, and analogues | <i>Biochemical pathway:</i> Phenylalanine and Tyrosine Metabolism, Transcription/Translation                                                                                                                                                                      | blood, breastmilk, csf, feces, saliva, sweat, urine               | <a href="http://www.hmdb.ca/metabolites/HMDB0000159">http://www.hmdb.ca/metabolites/HMDB0000159</a>                   |
| Czech et al., 2013              | CSF          | 1 CSF                    | not added                               | NA                     | NA                                | 14941096 (unknown)                                                              | NA                                      | NA                                   | NA                                                                                                                                                                                                                                                                | NA                                                                | NA                                                                                                                    |
| de Leeuw et al., 2017           | Plasma       | 2 (1 serum and 1 plasma) | amino acid metabolism                   | <a href="#">C00082</a> | HMDB0000158                       | L-Tyrosine                                                                      | organic acids and derivatives           | amino acids, peptides, and analogues | <i>Biochemical pathway:</i> Catecholamine Biosynthesis, Disulfiram Action Pathway, Phenylalanine and Tyrosine Metabolism, Thyroid hormone synthesis, Transcription/Translation, Tyrosine Metabolism                                                               | blood, breast milk, CSF, feces, saliva, sweat, urine              | <a href="http://www.hmdb.ca/metabolites/HMDB0000158">http://www.hmdb.ca/metabolites/HMDB0000158</a>                   |
| de Leeuw et al., 2017           | Plasma       | 1 plasma                 | amino acid metabolism                   | <a href="#">C02037</a> | HMDB0011733                       | glycylglycine (Glycyl-glycine)                                                  | Organic acids and derivatives           | amino acids, peptides, and analogues | <i>Biochemical pathway:</i> Prostate cancer                                                                                                                                                                                                                       | blood, feces, saliva, sweat, urine                                | <a href="http://www.hmdb.ca/metabolites/HMDB0011733">http://www.hmdb.ca/metabolites/HMDB0011733</a>                   |
| de Leeuw et al., 2017           | Plasma       | already counted          | amino acid metabolism                   | <a href="#">C00064</a> | HMDB0000641                       | glutamine (L-Glutamine)                                                         | organic acids and derivatives           | amino acids, peptides, and analogues | <i>Biochemical pathway:</i> Amino Sugar Metabolism, Ammonia Recycling, Aspartate Metabolism, Azathioprine Action Pathway, Glutamate Metabolism and plus                                                                                                           | blood, breast milk, CSF, feces, saliva, sweat, urine              | <a href="http://www.hmdb.ca/metabolites/HMDB0000641">http://www.hmdb.ca/metabolites/HMDB0000641</a>                   |
| de Leeuw et al., 2017           | Plasma       | 1 plasma                 | lipid metabolism                        | NA                     | NA                                | lysophosphatic acid C18:2 or LPA C18:2 (LysaPA(0:0118:2/9Z,12Z))                | Lipids and lipid-like molecules         | glycerophosphates                    | NA                                                                                                                                                                                                                                                                | feces                                                             | <a href="http://www.hmdb.ca/metabolites/HMDB0007852">http://www.hmdb.ca/metabolites/HMDB0007852</a>                   |
| de Leeuw et al., 2017           | Plasma       | 1 plasma                 | lipid metabolism                        | NA                     | HMDB0062195                       | platelet-activating factor C16:0 (2-acetyl-1-alkyl-sn-glycero-3-phosphocholine) | Lipids and lipid-like molecules         | glycerophosphocholines               | <i>Biochemical pathway:</i> Glycerophospholipid metabolism, Lipid metabolism pathway                                                                                                                                                                              | blood                                                             | <a href="http://www.hmdb.ca/metabolites/HMDB0062195">http://www.hmdb.ca/metabolites/HMDB0062195</a>                   |
| Graham et al., 2015             | Plasma       | 1 plasma                 | amino acid metabolism                   | NA                     | NA                                | 4-aminobutanol (1-(3-Aminopropyl)-4-aminobutanol)                               | Organic acids and derivatives           | amino acids, peptides, and analogues | NA                                                                                                                                                                                                                                                                | NA                                                                | <a href="http://www.hmdb.ca/metabolites/HMDB0012135">http://www.hmdb.ca/metabolites/HMDB0012135</a>                   |
| Graham et al., 2015             | Plasma       | 1 plasma                 | amino acid metabolism                   | <a href="#">C00300</a> | HMDB0000064                       | creatine                                                                        | Organic acids and derivatives           | Amino acids, peptides, and analogues | <i>Biochemical pathway:</i> Arginine and Proline Metabolism, Glycine and Serine Metabolism                                                                                                                                                                        | blood, breast milk, csf, feces, saliva, sweat, urine              | <a href="http://www.hmdb.ca/metabolites/HMDB0000064">http://www.hmdb.ca/metabolites/HMDB0000064</a>                   |
| Graham et al., 2015             | Plasma       | 1 plasma                 | amino acid metabolism                   | <a href="#">C00334</a> | HMDB0000112                       | GABA (gamma-Aminobutyric acid)                                                  | Organic acids and derivatives           | Amino acids, peptides, and analogues | <i>Biochemical pathway:</i> Glutamate Metabolism, Homocarnosinosis                                                                                                                                                                                                | blood, csf, feces, saliva, urine                                  | <a href="http://www.hmdb.ca/metabolites/HMDB0000112">http://www.hmdb.ca/metabolites/HMDB0000112</a>                   |
| Graham et al., 2015             | Plasma       | already counted          | amino acid metabolism                   | <a href="#">C00062</a> | HMDB0000517                       | L-arginine                                                                      | Organic acids and derivatives           | Amino acids, peptides, and analogues | <i>Biochemical pathway:</i> Lysinuric protein intolerance, Arginine and Proline Metabolism, Aspartate Metabolism, Glycine and Serine Metabolism, Hypocytaspartia, Transcription/Translation, urea cycle                                                           | blood, csf, feces, saliva, sweat, urine                           | <a href="http://www.hmdb.ca/metabolites/HMDB0000517">http://www.hmdb.ca/metabolites/HMDB0000517</a>                   |
| Graham et al., 2015             | Plasma       | already counted          | amino acid metabolism                   | <a href="#">C00077</a> | HMDB0000214                       | L-ornithine (ornithine)                                                         | Organic acids and derivatives           | Amino acids, peptides, and analogues | <i>Biochemical pathway:</i> Lysinuric protein intolerance, Arginine and Proline Metabolism, Glycine and Serine Metabolism, Spermidine and Spermine Biosynthesis, urea cycle                                                                                       | blood, csf, feces, saliva, sweat, urine                           | <a href="http://www.hmdb.ca/metabolites/HMDB0000214">http://www.hmdb.ca/metabolites/HMDB0000214</a>                   |
| Graham et al., 2015             | Plasma       | 1 plasma                 | amino acid metabolism                   | <a href="#">C00170</a> | HMDB0001173                       | methylthioadenosine (5'-Methylthioadenosine)                                    | Nucleosides, nucleotides, and analogues | 5'-deoxy-5'-thionucleosides          | <i>Biochemical pathway:</i> Methionine Metabolism, Spermidine and Spermine Biosynthesis                                                                                                                                                                           | blood, feces, urine                                               | <a href="http://www.hmdb.ca/metabolites/HMDB0001173">http://www.hmdb.ca/metabolites/HMDB0001173</a>                   |
| Graham et al., 2015             | Plasma       | 1 plasma                 | amino acid metabolism                   | <a href="#">C01029</a> | HMDB0002189                       | N1 or N8-acetyl-spermidine (N8-Acetylspermidine)                                | Organic acids and derivatives           | Carboximidic acids                   | NA                                                                                                                                                                                                                                                                | blood, saliva, urine                                              | <a href="http://www.hmdb.ca/metabolites/HMDB0002189">http://www.hmdb.ca/metabolites/HMDB0002189</a>                   |
| Graham et al., 2015             | Plasma       | 1 plasma                 | amino acid metabolism                   | <a href="#">C02714</a> | HMDB0002064                       | N-acetylputrescine                                                              | Organic acids and derivatives           | Carboximidic acids                   | NA                                                                                                                                                                                                                                                                | blood, feces, saliva, urine                                       | <a href="http://www.hmdb.ca/metabolites/HMDB0002064">http://www.hmdb.ca/metabolites/HMDB0002064</a>                   |
| Graham et al., 2015             | Plasma       | 1 plasma                 | amino acid metabolism                   | <a href="#">C02896</a> | HMDB0001414                       | putrescine                                                                      | Organic nitrogen compounds              | Amines                               | <i>Biochemical pathway:</i> Pancreatic cancer, Methionine Metabolism, Spermidine and Spermine Biosynthesis                                                                                                                                                        | blood, csf, feces, saliva, urine                                  | <a href="http://www.hmdb.ca/metabolites/HMDB0001414">http://www.hmdb.ca/metabolites/HMDB0001414</a>                   |
| Graham et al., 2015             | Plasma       | 1 plasma                 | amino acid metabolism                   | <a href="#">C00315</a> | HMDB0001257                       | spermidine                                                                      | Organic nitrogen compounds              | Amines                               | <i>Biochemical pathway:</i> Methionine Metabolism, Spermidine and Spermine Biosynthesis                                                                                                                                                                           | blood, csf, feces, saliva, urine                                  | <a href="http://www.hmdb.ca/metabolites/HMDB0001257">http://www.hmdb.ca/metabolites/HMDB0001257</a>                   |
| Graham et al., 2015             | Plasma       | 1 plasma                 | amino acid metabolism                   | <a href="#">C00750</a> | HMDB0001256                       | spermine                                                                        | Organic nitrogen compounds              | Amines                               | <i>Biochemical pathway:</i> Spermidine and Spermine Biosynthesis                                                                                                                                                                                                  | blood, csf, feces, saliva, urine                                  | <a href="http://www.hmdb.ca/metabolites/HMDB0001256">http://www.hmdb.ca/metabolites/HMDB0001256</a>                   |
| Graham et al., 2015             | Plasma       | 1 plasma                 | amino acid metabolism                   | <a href="#">C03413</a> | HMDB0002172                       | N1, N12-diacetylspermine                                                        | Organic acids and derivatives           | Carboximidic acids                   | NA                                                                                                                                                                                                                                                                | blood, feces, urine                                               | <a href="http://www.hmdb.ca/metabolites/HMDB0002172">http://www.hmdb.ca/metabolites/HMDB0002172</a> , PubMed: 7775374 |
| Trushina et al., 2013           | Plasma & CSF | NA                       | NA                                      | NA                     | NA (too many, went with pathways) | NA                                                                              | NA                                      | NA                                   | NA                                                                                                                                                                                                                                                                | NA                                                                | NA                                                                                                                    |
| Gonzalez-Dominquez et al., 2015 | Serum        | 1 serum                  | amino acid metabolism                   | <a href="#">C00026</a> | HMDB0000208                       | alpha-ketoglutarate (oxoglutaric acid)                                          | organic acids and derivatives           | gamma-keto acids and derivatives     | <i>Biochemical pathway:</i> Alanine Metabolism, Ammonia Recycling, Arginine and Proline Metabolism, Aspartate Metabolism, Beta-Alanine Metabolism plus                                                                                                            | urine, saliva, feces, blood, breast milk, CSF                     | <a href="http://www.hmdb.ca/metabolites/HMDB0000208">http://www.hmdb.ca/metabolites/HMDB0000208</a>                   |
| Gonzalez-Dominquez et al., 2015 | Serum        | 1 serum                  | carbohydrate metabolism (not added)     | <a href="#">C00311</a> | HMDB0000193                       | isocitric acid                                                                  | organic acids and derivatives           | tricarboxylic acids and derivatives  | <i>Biochemical pathway:</i> Citric Acid Cycle, Congenital lactic acidosis, Glutaminolysis and Cancer, The oncogenic action of 2-hydroxyglutarate, The Oncogenic Action of Fumarate, The Oncogenic Action of Succinate, Warburg effect                             | blood, cellular cytoplasm, CSF, saliva, semen, urine              | <a href="http://www.hmdb.ca/metabolites/HMDB0000193">http://www.hmdb.ca/metabolites/HMDB0000193</a>                   |
| Gonzalez-Dominquez et al., 2015 | Serum        | 1 serum                  | carbohydrate metabolism (not added)     | <a href="#">C00031</a> | HMDB0000122                       | glucose (D-Glucose)                                                             | organic oxygen compounds                | carb and carb conjugates             | <i>Biochemical pathway:</i> congenital disorder of glycosylation CDG-Hd, galactose metabolism, gibberellinamide action pathway, gliclazide action pathway, globoid cell leukodystrophy and plus                                                                   | blood, breast milk, CSF, feces, saliva, sweat, urine              | <a href="http://www.hmdb.ca/metabolites/HMDB0000122">http://www.hmdb.ca/metabolites/HMDB0000122</a>                   |
| Gonzalez-Dominquez et al., 2015 | Serum        | 1 serum                  | lipid metabolism                        | <a href="#">C00712</a> | HMDB0000207                       | oleic acid                                                                      | lipid and lipid-like molecules          | fatty acids and conjugates           | <i>Biochemical pathway:</i> Lipid metabolism pathway                                                                                                                                                                                                              | blood, CSF, feces, saliva, urine                                  | <a href="http://www.hmdb.ca/metabolites/HMDB0000207">http://www.hmdb.ca/metabolites/HMDB0000207</a>                   |
| Gonzalez-Dominquez et al., 2015 | Serum        | 1 serum                  | nucleotide metabolism                   | <a href="#">C00212</a> | HMDB0000050                       | adenosine                                                                       | nucleosides, nucleotides, and analogues | N/A                                  | <i>Biochemical pathway:</i> Azathioprine Action Pathway, Betaine Metabolism, Intracellular Signalling Through Adenosine Receptor A2a and Adenosine, Intracellular Signalling Through Adenosine Receptor A2b and Adenosine, Mercaptopurine Action Pathway and plus | blood, breast milk, cellular cytoplasm, CSF, feces, saliva, urine | <a href="http://www.hmdb.ca/metabolites/HMDB0000050">http://www.hmdb.ca/metabolites/HMDB0000050</a>                   |

|                                 |       |                 |                       |                        |             |                                 |                                 |                                           |                                                                                                                                                                                                              |                                                                          |                                                                                                                                                                                                                                                                                                                                                           |
|---------------------------------|-------|-----------------|-----------------------|------------------------|-------------|---------------------------------|---------------------------------|-------------------------------------------|--------------------------------------------------------------------------------------------------------------------------------------------------------------------------------------------------------------|--------------------------------------------------------------------------|-----------------------------------------------------------------------------------------------------------------------------------------------------------------------------------------------------------------------------------------------------------------------------------------------------------------------------------------------------------|
| Gonzalez-Dominquez et al., 2015 | Serum | 1 serum         | lipid metabolism      | <a href="#">C00187</a> | HMDB0000067 | cholesterol                     | lipid and lipid-like molecules  | cholesterols steroids                     | <i>Biochemical pathway:</i> Biochemical pathway: Alendronate Action Pathway, Atorvastatin Action Pathway, bile acid biosynthesis, Cerebrotendinous Xanthomatosis (CTX), Cerivastatin Action Pathway and plus | bile, blood, CSF, feces saliva                                           | <a href="http://www.hmdb.ca/metabolites/HMDB0000067">http://www.hmdb.ca/metabolites/HMDB0000067</a>                                                                                                                                                                                                                                                       |
| Gonzalez-Dominquez et al., 2015 | Serum | 1 serum         | amino acid metabolism | <a href="#">C00086</a> | HMDB0000294 | urea                            | organic acids and derivatives   | organic carbonic acids and derivatives    | <i>Biochemical pathway:</i> Amiloride Action Pathway, Arginine and Proline Metabolism, Bendroflumethiazide Action Pathway, Bumetanide Action Pathway, Chlorothiazide Action Pathway and plus                 | blood, breast milk, cellular cytoplasm, CSF, feces, saliva, urine, sweat | <a href="http://www.hmdb.ca/metabolites/HMDB0000294">http://www.hmdb.ca/metabolites/HMDB0000294</a>                                                                                                                                                                                                                                                       |
| Gonzalez-Dominquez et al., 2015 | Serum | 1 serum         | amino acid metabolism | <a href="#">C00183</a> | HMDB0000883 | valine (L-Valine)               | organic acids and derivatives   | amino acids, peptides, and analogues      | <i>Biochemical pathway:</i> Amikacin Action Pathway, Arbekacin Action Pathway, Azithromycin Action Pathway, Chloramphenicol Action Pathway, Clarithromycin Action Pathway and plus                           | blood, breast milk, CSF, feces, saliva, sweat, urine                     | <a href="http://www.hmdb.ca/metabolites/HMDB0000883">http://www.hmdb.ca/metabolites/HMDB0000883</a>                                                                                                                                                                                                                                                       |
| Gonzalez-Dominquez et al., 2015 | Serum | already counted | amino acid metabolism | <a href="#">C00049</a> | HMDB0000191 | aspartic acid (L-aspartic acid) | organic acids and derivatives   | Amino acids, peptides, and analogues      | <i>Biochemical pathway:</i> Ammonia Recycling, Arginine and Proline Metabolism, Aspartate Metabolism, Azathioprine Action Pathway, Beta-Alanine Metabolism                                                   | blood, CSF, breast milk, feces, saliva, sweat, urine                     | <a href="http://www.hmdb.ca/metabolites/HMDB0000191">http://www.hmdb.ca/metabolites/HMDB0000191</a>                                                                                                                                                                                                                                                       |
| Gonzalez-Dominquez et al., 2015 | Serum | 1 serum         | amino acid metabolism | <a href="#">C01879</a> | HMDB0000267 | pyroglutamic acid               | organic acids and derivatives   | amino acids, peptides, and analogues      | <i>Biochemical pathway:</i> Glutathione Metabolism                                                                                                                                                           | saliva, feces, urine, blood, CSF                                         | <a href="http://www.hmdb.ca/metabolites/HMDB0000267">http://www.hmdb.ca/metabolites/HMDB0000267</a>                                                                                                                                                                                                                                                       |
| Gonzalez-Dominquez et al., 2015 | Serum | already counted | amino acid metabolism | <a href="#">C00064</a> | HMDB0000641 | glutamine (L-Glutamine)         | organic acids and derivatives   | amino acids, peptides, and analogues      | <i>Biochemical pathway:</i> Amino Sugar Metabolism, Ammonia Recycling, Aspartate Metabolism, Azathioprine Action Pathway, Glutamate Metabolism and plus                                                      | blood, breast milk, CSF, feces, saliva, sweat, urine                     | <a href="http://www.hmdb.ca/metabolites/HMDB0000641">http://www.hmdb.ca/metabolites/HMDB0000641</a>                                                                                                                                                                                                                                                       |
| Gonzalez-Dominquez et al., 2015 | Serum | already counted | amino acid metabolism | <a href="#">C00079</a> | HMDB0000159 | phenylalanine (L-phenylalanine) | Organic acids and derivatives   | Amino acids, peptides, and analogues      | <i>Biochemical pathway:</i> Phenylalanine and Tyrosine Metabolism, Transcription/Translation                                                                                                                 | blood, breastmilk, csf, feces, saliva, sweat, urine                      | <a href="http://www.hmdb.ca/metabolites/HMDB0000159">http://www.hmdb.ca/metabolites/HMDB0000159</a>                                                                                                                                                                                                                                                       |
| Gonzalez-Dominquez et al., 2015 | Serum | already counted | amino acid metabolism | <a href="#">C00152</a> | HMDB0000168 | asparagine (L-Asparagine)       | Organic acids and derivatives   | Amino acids, peptides, and analogues      | <i>Biochemical pathway:</i> Amikacin Action Pathway, Ammonia Recycling, Arbekacin Action Pathway, Aspartate Metabolism, Azithromycin Action Pathway and plus                                                 | blood, breast milk, csf, feces, saliva, sweat, urine                     | <a href="http://www.hmdb.ca/metabolites/HMDB0000168">http://www.hmdb.ca/metabolites/HMDB0000168</a>                                                                                                                                                                                                                                                       |
| Gonzalez-Dominquez et al., 2015 | Serum | already counted | amino acid metabolism | <a href="#">C00077</a> | HMDB0000214 | ornithine                       | Organic acids and derivatives   | Amino acids, peptides, and analogues      | <i>Biochemical pathway:</i> Lysinuric protein intolerance, Arginine and Proline Metabolism, Glycine and Serine Metabolism, Spermidine and Spermine Biosynthesis, urea cycle                                  | blood, csf, feces, saliva, sweat, urine                                  | <a href="http://www.hmdb.ca/metabolites/HMDB0000214">http://www.hmdb.ca/metabolites/HMDB0000214</a>                                                                                                                                                                                                                                                       |
| Gonzalez-Dominquez et al., 2015 | Serum | 1 serum         | amino acid metabolism | <a href="#">C00408</a> | HMDB0000070 | pipelicolic acid                | organic acids and derivatives   | Amino acids, peptides, and analogues      | NA                                                                                                                                                                                                           | Amniotic Fluid,blood, CSF, feces, saliva,urine                           | <a href="http://www.hmdb.ca/metabolites/HMDB0000070">http://www.hmdb.ca/metabolites/HMDB0000070</a>                                                                                                                                                                                                                                                       |
| Gonzalez-Dominquez et al., 2015 | Serum | 1 serum         | amino acid metabolism | <a href="#">C00135</a> | HMDB0000177 | histidine (L-Histidine)         | organic acids and derivatives   | Amino acids, peptides, and analogues      | <i>Biochemical pathway:</i> Amikacin Action Pathway, Ammonia Recycling, Arbekacin Action Pathway, Azithromycin Action Pathway, Beta-Alanine Metabolism and plus                                              | blood, breast milk, CSF, feces, saliva, sweat, urine                     | <a href="http://www.hmdb.ca/metabolites/HMDB0000177">http://www.hmdb.ca/metabolites/HMDB0000177</a>                                                                                                                                                                                                                                                       |
| Gonzalez-Dominquez et al., 2015 | Serum | already counted | amino acid metabolism | <a href="#">C00082</a> | HMDB0000158 | tyrosine (L-Tyrosine)           | organic acids and derivatives   | amino acids, peptides, and analogues      | <i>Biochemical pathway:</i> Catecholamine Biosynthesis, Disulfiram Action Pathway, Phenylalanine and Tyrosine Metabolism, Thyroid hormone synthesis, Transcription/Translation, Tyrosine Metabolism          | blood, breast milk, CSF, feces, saliva, sweat, urine                     | <a href="http://www.hmdb.ca/metabolites/HMDB0000158">http://www.hmdb.ca/metabolites/HMDB0000158</a>                                                                                                                                                                                                                                                       |
| Gonzalez-Dominquez et al., 2015 | Serum | 1 serum         | nucleotide metabolism | <a href="#">C00266</a> | HMDB0000289 | uric acid                       | Organoheterocyclic compounds    | Purines and purine derivatives            | <i>Biochemical pathway:</i> Azathioprine Action Pathway, Mercaptopurine Action Pathway, Purine Metabolism, Thioguanine Action Pathway                                                                        | Amniotic Fluid, Bile, Blood, CSF, Feces, Saliva, Urine                   | <a href="http://www.hmdb.ca/metabolites/HMDB0000289">http://www.hmdb.ca/metabolites/HMDB0000289</a>                                                                                                                                                                                                                                                       |
| Gonzalez-Dominquez et al., 2015 | Serum | 1 serum         | lipid metabolism      | <a href="#">C00249</a> | HMDB0000220 | palmitic acid                   | Lipids and lipid-like molecules | fatty acids and conjugates                | <i>Biochemical pathway:</i> Alendronate Action Pathway, Atorvastatin Action Pathway, bile acid biosynthesis, Cerebrotendinous Xanthomatosis (CTX), Cerivastatin Action Pathway and plus                      | blood, CSF, Feces, Saliva, Sweat, Urine                                  | <a href="http://www.hmdb.ca/metabolites/HMDB0000220">http://www.hmdb.ca/metabolites/HMDB0000220</a>                                                                                                                                                                                                                                                       |
| Gonzalez-Dominquez et al., 2015 | Serum | 1 serum         | check                 | <a href="#">C00525</a> | HMDB0013609 | tryptophan (D-Tryptophan)       | organoheterocyclic compounds    | indolyl carboxylic acids and derivatives  | NA                                                                                                                                                                                                           | blood, feces                                                             | <a href="http://www.hmdb.ca/metabolites/HMDB0013609">http://www.hmdb.ca/metabolites/HMDB0013609</a>                                                                                                                                                                                                                                                       |
| Gonzalez-Dominquez et al., 2015 | Serum | 1 serum         | lipid metabolism      | <a href="#">C01530</a> | HMDB0000827 | stearic acid                    | Lipids and lipid-like molecules | fatty acids and conjugates                | <i>Biochemical pathway:</i> Mitochondrial Beta-Oxidation of Long Chain Saturated Fatty Acids, Plasmalogen Synthesis, Lipid metabolism pathway                                                                | blood, CSF, feces, saliva,sweat,urine                                    | <a href="http://www.hmdb.ca/metabolites/HMDB0000827">http://www.hmdb.ca/metabolites/HMDB0000827</a>                                                                                                                                                                                                                                                       |
| Gonzalez-Dominquez et al., 2015 | Serum | 1 serum         | amino acid metabolism | <a href="#">C00491</a> | HMDB0000192 | cystine (L-Cystine)             | organic acids and derivatives   | amino acids, peptides, and analogues      | NA                                                                                                                                                                                                           | blood, CSF, feces, urine                                                 | <a href="http://www.hmdb.ca/metabolites/HMDB0000192">http://www.hmdb.ca/metabolites/HMDB0000192</a>                                                                                                                                                                                                                                                       |
| Orešič et al. 2011              | Serum | 1 serum         | lipid metabolism      | NA                     | HMDB0000360 | 2,4-dihydroxybutanoic acid      | Organic acids and derivatives   | short-chain hydroxy acids and derivatives | NA                                                                                                                                                                                                           | blood, CSF, urine                                                        | <a href="http://www.hmdb.ca/metabolites/HMDB0000360">http://www.hmdb.ca/metabolites/HMDB0000360</a> ; <a href="https://pubchem.ncbi.nlm.nih.gov/compound/2_4-Dihydroxybutanoic_acid#section=Chemical-Co-Occurrences-in-Literature">https://pubchem.ncbi.nlm.nih.gov/compound/2_4-Dihydroxybutanoic_acid#section=Chemical-Co-Occurrences-in-Literature</a> |
| Orešič et al. 2011              | Serum | NA              | not added             | NA                     | NA          | unidentified carboxylic acid    | NA                              | NA                                        | NA                                                                                                                                                                                                           | NA                                                                       | NA                                                                                                                                                                                                                                                                                                                                                        |
| Orešič et al. 2011              | Serum | 1 serum         | lipid metabolism      | <a href="#">C00157</a> | HMDB0000564 | PC 16.0/16.0                    | Lipids and lipid-like molecules | Glycerophosphocholines                    | <i>Biochemical pathway:</i> phosphatidylcholine biosynthesis, phosphatidylethanolamine biosynthesis, Phospholipid Biosynthesis, Glycerophospholipid metabolism, Lipid metabolism pathway                     | blood, feces, saliva, urine                                              | <a href="http://www.hmdb.ca/metabolites/HMDB0000564">http://www.hmdb.ca/metabolites/HMDB0000564</a>                                                                                                                                                                                                                                                       |

**Table S3:** Detailed information on metabolites. We include key metabolites highlighted in the 11 studies reviewed. We queried for specific details on each metabolite listed on three different databases: HMDB, KEGG Pathway, and PubMed.



| Gene                                                        | Symbol            | MAF   | AD Pathways                                                                                     | Desiken<br>2017 | Morgan<br>2017* | Slegers<br>2015 | Escott-Price<br>2017 | Xiao<br>2015 | Adams<br>2015 | Chouraki<br>2016 | Tosto<br>2017 | Martiskainen<br>2015 | Naj<br>2014 | Escott-Price<br>2015^ |
|-------------------------------------------------------------|-------------------|-------|-------------------------------------------------------------------------------------------------|-----------------|-----------------|-----------------|----------------------|--------------|---------------|------------------|---------------|----------------------|-------------|-----------------------|
| <i>Early-onset familial AD</i>                              |                   |       |                                                                                                 |                 |                 |                 |                      |              |               |                  |               |                      |             |                       |
| Amyloid $\beta$ (A4) precursor protein                      | <i>APP</i>        |       | abnormal A $\beta$ production, clearance & aggregation; amyloid hypothesis (A $\beta$ cascade)  |                 |                 |                 |                      |              |               |                  |               |                      |             |                       |
| Presenilin 1                                                | <i>PSEN1</i>      |       | abnormal A $\beta$ production, clearance & aggregation; amyloid hypothesis (A $\beta$ cascade)  |                 |                 |                 |                      |              |               |                  |               |                      |             |                       |
| Presenilin 2                                                | <i>PSEN2</i>      |       | abnormal A $\beta$ production, clearance & aggregation; amyloid hypothesis (A $\beta$ cascade)  |                 |                 |                 |                      |              |               |                  |               |                      |             |                       |
| <i>Late-onset AD: Common, High Risk</i>                     |                   |       |                                                                                                 |                 |                 |                 |                      |              |               |                  |               |                      |             |                       |
| Apolipoprotein E                                            | <i>APOE</i>       | 0.12  | abnormal A $\beta$ clearance & aggregation; inflammatory response, cholesterol/lipid metabolism | x               | x               | x               |                      | x            | x             | x                | x             | x                    | x           | x                     |
| <i>Late-onset AD: Rare, High Risk</i>                       |                   |       |                                                                                                 |                 |                 |                 |                      |              |               |                  |               |                      |             |                       |
| Triggering receptor expressed on myeloid cells 2            | <i>TREM2</i>      | 0.002 | immune response & inflammation                                                                  |                 |                 | x               |                      |              |               |                  |               |                      |             |                       |
| Phospholipase D 3                                           | <i>PLD3</i>       | -     | unknown                                                                                         |                 |                 |                 |                      |              |               |                  |               |                      |             |                       |
| <i>Late-onset AD: Common, Low Risk</i>                      |                   |       |                                                                                                 |                 |                 |                 |                      |              |               |                  |               |                      |             |                       |
| ATP-binding cassette, subfamily A (ABC1), member 7          | <i>ABCA7</i>      | 0.16  | cholesterol/lipid metabolism, inflammatory response                                             | x               |                 | x               |                      |              | x             | x                | x             | x                    |             | x                     |
| Bridging integrator 1                                       | <i>BIN1</i>       | 0.37  | abnormal A $\beta$ production & clearance; synaptic vesicle endocytosis                         | x               |                 | x               |                      |              | x             | x                | x             | x                    |             | x                     |
| Cas scaffolding protein family member 4                     | <i>CASS4</i>      | 0.08  | APP, tau, cytoskeletal function, axonal transport                                               | x               |                 | x               |                      |              |               | x                | x             | x                    |             |                       |
| CD2-associated protein                                      | <i>CD2AP</i>      | 0.26  | receptor endocytosis & cytokinesis                                                              |                 |                 | x               |                      | x            | x             | x                | x             | x                    |             | x                     |
| CD33 molecule                                               | <i>CD33</i>       | -     | inflammatory response                                                                           |                 |                 | x               |                      |              |               |                  | x             | x                    |             | x                     |
| CUGBP, Elav-like family member 1                            | <i>CELF1</i>      | 0.31  | cytoskeletal function, axonal transport, tau pathology                                          |                 |                 | x               |                      |              | x             | x                | x             | x                    |             |                       |
| Clusterin                                                   | <i>CLU</i>        | 0.4   | abnormal A $\beta$ clearance & aggregation; inflammatory response; cholesterol/lipid metabolism | x               |                 | x               |                      |              | x             | x                | x             | x                    |             | x                     |
| Complement component (3b/4b) receptor 1 (Knops blood group) | <i>CRI</i>        | 0.19  | abnormal A $\beta$ clearance; inflammatory response                                             | x               |                 | x               |                      |              | x             | x                | x             | x                    |             | x                     |
| Desmoglein 2                                                | <i>DSG2</i>       | -     |                                                                                                 |                 |                 |                 |                      |              |               |                  | x             | x                    |             |                       |
| EPH receptor A1                                             | <i>EPHA1</i>      | 0.35  | inflammatory response                                                                           |                 |                 | x               |                      |              | x             | x                | x             | x                    |             | x                     |
| Fermitin family member 2                                    | <i>FERMT2</i>     | 0.08  | tau pathology, angiogenesis                                                                     | x               |                 | x               |                      | x            | x             | x                | x             | x                    |             |                       |
| Major histocompatibility complex class II DR beta 5         | <i>HLA - DRB1</i> | 0.28  | immune response, inflammation                                                                   | x               |                 | x               |                      |              |               | x                | x             | x                    |             |                       |

|                                                                         |                   |      |                                                                                                                                                                |   |   |   |   |   |    |   |
|-------------------------------------------------------------------------|-------------------|------|----------------------------------------------------------------------------------------------------------------------------------------------------------------|---|---|---|---|---|----|---|
| Complex, class II, DR beta 1 and DR beta 1                              | <i>HLA - DRB5</i> | -    |                                                                                                                                                                | x | x |   | x | x | x  |   |
| Inositol polyphosphate 5 phosphatase, 145kDa                            | <i>INPP5D</i>     | 0.46 | immune response & inflammation, APP metabolism; regulation of gene expression; post-translational modification of proteins; microglial & myeloid cell function | x | x |   | x | x | x  | x |
| Myocyte enhancer factor 2C                                              | <i>MEF2C</i>      | 0.39 | immune response & inflammation; hippocampal synaptic function                                                                                                  |   | x |   | x | x | x  | x |
| Membrane-spanning 4 domains, subfamily A, member 6A                     | <i>MS4A6A</i>     | 0.41 | inflammatory response                                                                                                                                          | x | x |   | x | x | lx | x |
| Membrane-spanning 4 domains, subfamily A, member 4E                     | <i>MS4A4E</i>     | -    | inflammatory response                                                                                                                                          |   |   |   |   |   | lx | x |
| NME/NM23 family member 8                                                | <i>NME8</i>       | 0.37 | cytoskeletal function, axonal transport                                                                                                                        |   | x |   | x | x | x  | x |
| Phosphatidylinositol-binding clathrin assembly protein                  | <i>PICALM</i>     | 0.37 | abnormal Aβ production & clearance; clathrin-mediated endocytosis; synaptic transmission                                                                       | x | x |   |   | x | x  | x |
| Protein tyrosine kinase 2 beta                                          | <i>PTK2B</i>      | 0.36 | hippocampal synaptic function, cell migration                                                                                                                  | x | x |   | x | x | x  | x |
| Sortilin-related receptor, L (DLR class) A repeats containing           | <i>SORL1</i>      | 0.04 | endocytosis & cargo sorting (trafficking and metabolism of APP), lipid transport                                                                               | x | x | x | x | x | x  | x |
| Solute carrier family 24 (sodium/potassium/calcium exchanger), member 4 | <i>SLC24A4</i>    | 0.21 | possible cardiovascular risk                                                                                                                                   | x | x |   | x | x | x  | x |
| Triggering receptor expressed on myeloid cells L2                       | <i>TREML2</i>     | -    | unknown, protective                                                                                                                                            |   |   |   |   |   |    |   |
| Zinc finger, CW type with PWWP domain 1                                 | <i>ZCWPW1</i>     | 0.29 | epigenetic regulation                                                                                                                                          | x | x |   | x | x | x  |   |

**Table S4:** Key AD risk genes and major AD-related pathway(s) associated with each genes. Listed are the 3 early-onset familial AD genes; high-risk common and rare late-onset AD genes; and 24 key GWAS identified, low-risk, late-onset AD genes. Studies are listed in the order of appearance in the section entitled "Polygenic Risk Score Approach". An "x" indicates if the PRS includes one of the 24 key GWAS identified, low-risk, late-onset AD genes. \* indicates that the PRS was comprised of 87,605 SNPs, which included APOE. ^ indicates that the PRS was comprised of 6,928,531 SNPs, which included APOE. Studies used for the compilation of the genes in the table are as follows: Bertram and Tanzi, 2012; Gómez-Tortosa et al., 2018; Guerreiro, Brás, & Hardy, 2012; Harold et al., 2009; Hollingworth et al., 2011; Kunkle et al., 2018; Lambert et al., 2013; Medway & Morgan, 2014; Reitz, 2015. Abbreviations: AD = Alzheimer's Disease. MAF = minor allele frequency.

| Study                    | N     | M    | Cohort(s)                                                                   | # of SNPs (P, nP) | Method (P, nP)                  | AD-dementia    |      |             |          | MCI |   |     |    | HC SD          | Other Biomarkers | CA        |      |                                   |                                          |     |
|--------------------------|-------|------|-----------------------------------------------------------------------------|-------------------|---------------------------------|----------------|------|-------------|----------|-----|---|-----|----|----------------|------------------|-----------|------|-----------------------------------|------------------------------------------|-----|
|                          |       |      |                                                                             |                   |                                 | N              | M    | Age         | SD       | N   | M | Age | SD |                |                  |           |      |                                   |                                          |     |
| Desikan et al, 2017      | 54162 | -    | IGAP                                                                        | 31 (P)            | hazard ratios (P)               | 17008          | 6293 | 74.7        | 8        | -   | - | -   | -  | 37154          | 15976            | 68.6      | 8.5  | -                                 | -                                        |     |
|                          | 15795 | -    | ADGC1                                                                       |                   |                                 | 6409           | 2500 | 74.7        | 7.7      | -   | - | -   | -  | 9386           | 3848             | 76.4      | 8.1  | -                                 | -                                        |     |
|                          | 17956 | -    | ADGC2                                                                       |                   |                                 | 6984           | 2961 | 73.6        | 7.3      | -   | - | -   | -  | 10972          | 4312             | 75.7      | 8.6  | -                                 | -                                        |     |
|                          | 3321  | -    | NIA-ADC                                                                     |                   |                                 | x              | -    | -           | -        | -   | - | -   | -  | -              | -                | -         | -    | -                                 | postmortem brain: tau, Aβ                | -   |
|                          | 692   | -    | ADNI1                                                                       |                   |                                 | x              | -    | -           | -        | -   | x | -   | -  | x              | -                | -         | -    | -                                 | CSF: Aβ42; t-tau, structural MRI volumes | yes |
| Morgan et al, 2017       | 93    | -    | GERAD1                                                                      | 87605 (P)         | weighted (P) (b)                | 93             | 36   | -           | -        | -   | - | -   | -  | -              | -                | -         | -    | plasma inflammatory markers       | -                                        |     |
| Sleegers et al, 2015     | 2451* | -    | Flanders - Belgian AD                                                       | 22 (P)            | additive vs weighted (P)        | 1328 (878 PRS) | 491  | Onset 74.4  | 8.9      | -   | - | -   | -  | 1123 (661 PRS) | 494              | 64.9      | 13.7 | CSF: Aβ42; t- & p-tau             | -                                        |     |
| Escott-Price et al, 2017 | 1594  | -    | IGAP subset                                                                 | 23 (P)            | weighted & normalized (P)       | 1011           | -    | -           | -        | -   | - | -   | -  | 583            | -                | -         | -    | postmortem confirmed              | -                                        |     |
| Xiao et al, 2015         | 1280  | -    | Chinese Han                                                                 | 6 (P)             |                                 | 459            | 228  | 71.2        | 9.6      | -   | - | -   | -  | 751            | 354              | 72.7      | 5.9  | -                                 | -                                        |     |
| Adams et al, 2015        | 3605  | 1548 | Rotterdam                                                                   | 19 (P)            | weighted (P)                    | 156            | -    | -           | -        | 360 | - | -   | -  | x              | -                | -         | -    | -                                 | yes                                      |     |
| Chouraki et al, 2016     | 19687 | -    | IGAP (cohorts included: 3C, ACT, AGES, CHS, FHS, ROSMAP, Rotterdam, WHICAP) | 19 (P)            | log transformed odds ratio (P)  | 2782           | -    | >65         | -        | -   | - | -   | -  | 16905          | -                | >65       | -    | -                                 | -                                        |     |
| Tosto et al, 2017        | 4792  | 1818 | NIA-LOAD                                                                    | 21 (P)            | weighted (P)                    | -              | -    | -           | -        | -   | - | -   | -  | -              | -                | -         | -    | -                                 | -                                        |     |
|                          | 3324  | 1136 | EFIGA (replication)                                                         |                   | weighted (P)                    | -              | -    | -           | -        | -   | - | -   | -  | -              | -                | -         | -    | -                                 | -                                        |     |
| Martiskainen et al, 2015 | 1591  | 575  | Finnish-AD                                                                  | 22 (P)            | log transformed odds ration (P) | 890            | 294  | Onset 69.8  | 8.2      | -   | - | -   | -  | 701            | 281              | Exam 69.1 | 6.2  | CSF: Aβ42, t- & p-tau             | -                                        |     |
|                          | 59    | 17   | Kuopio University Hospital                                                  |                   |                                 | 59             | 17   | 79.1 - 81.3 | 7 - 11.1 | -   | - | -   | -  | -              | -                | -         | -    | temporal cortex Aβ42; γ-secretase | -                                        |     |
| Naj et al, 2014          | 9162  | 3682 | ADGC                                                                        | 10 (P)            | unweighted (P)                  | 9162           | 3682 | Onset 74.3  | 7.6      | -   | - | -   | -  | -              | -                | -         | -    | -                                 | -                                        |     |
| Escott-Price et al, 2015 | 10454 | -    | GERAD (test sample)                                                         | 6928531 (P)       | weighted & normalized (P)       | 3177           | -    | -           | -        | -   | - | -   | -  | 7277           | -                | -         | -    | -                                 | -                                        |     |
| Karch et al, 2016        | 150   | 103  | GSE15745                                                                    | 21 (nP)           | NA                              | -              | -    | -           | -        | -   | - | -   | -  | 150            | 103              | 45.8      | -    | brain tissue                      | -                                        |     |
|                          | 364   | -    | GSE15222                                                                    |                   |                                 | 176            | 88   | 84          | -        | -   | - | -   | -  | 188            | 103              | 81        | -    | -                                 | -                                        |     |
|                          | 47    | -    | GSE5281                                                                     |                   |                                 | 33             | 15   | 79.9        | -        | -   | - | -   | -  | 14             | 10               | 79.8      | -    | -                                 | -                                        |     |
|                          | 134   | -    | UKBEC                                                                       |                   |                                 | -              | -    | -           | -        | -   | - | -   | -  | 134            | -                | -         | -    | -                                 | -                                        |     |
|                          | 74046 | -    | IGAP LOAD GWAS                                                              |                   |                                 | x              | -    | -           | -        | -   | - | -   | -  | x              | -                | -         | -    | -                                 | -                                        |     |
| 56260 (a)                | -     | ADGC |                                                                             |                   | x                               | -              | -    | -           | -        | -   | - | -   | x  | -              | -                | -         | -    | -                                 | -                                        |     |

|                       |        |      |                           |            |                                            |     |     |      |     |    |    |    |    |      |     |      |     |    |                    |
|-----------------------|--------|------|---------------------------|------------|--------------------------------------------|-----|-----|------|-----|----|----|----|----|------|-----|------|-----|----|--------------------|
| Rosenthal et al, 2014 | NA     | NA   | NA                        | 44 (nP)    | NA                                         | NA  | NA  | NA   | NA  | NA | NA | NA | NA | NA   | NA  | NA   | NA  | NA | NA                 |
| Raj et al, 2012       | -      | -    | ADGC; GERAD+              | 11 (nP)    | protein network integrated haplotype score | NA  | NA  | NA   | NA  | NA | NA | NA | NA | NA   | NA  | NA   | NA  | NA | NA                 |
| Ebbert et al, 2014    | 2419   | 1013 | Cache County Memory Study | 10 (P, nP) | weighted                                   | 326 | 119 | 80.2 | 7.2 | -  | -  | -  | -  | 2093 | 894 | 74.3 | 6.7 | -  | -                  |
| Patel et al, 2016     | 30,717 | -    | ENIGMA2 consortium ADNII  | 24 (nP)    | stratified false discovery rate            | -   | -   | -    | -   | -  | -  | -  | -  | -    | -   | -    | -   | -  | sMRI brain volumes |
|                       | 757    |      |                           |            |                                            | x   | -   | -    | -   | x  | -  | -  | -  | x    | -   | -    | -   | -  | -                  |
| Huang et al, 2018     | -      | -    | -                         | 335 (nP)   | support vector machine                     | -   | -   | -    | -   | -  | -  | -  | -  | -    | -   | -    | -   | -  | -                  |

**Table S5:** Studies listed in the order of appearance in the sections entitled "Polygenic Risk Score Approach" and "Mechanism-based Interaction and Network Approaches". \* indicates that sample demographic statistics is based on larger sample; (a) Information provided in Naj et al., 2011; (b) Information provided in Escott-Price et al. 2015. x indicates that a specific cohort was used, but detailed composition of cohorts was not provided. Abbreviations: 3C, Three City study; ACT, Adult Changes in Thought; ADGC, Alzheimer's disease genetics consortium; ADNI, Alzheimer's disease neuroimaging initiative; AGES, Age, Gene/Environment Susceptibility; CA, cognitive assessment; CHS, Cardiovascular Health Study; FHS, Framingham Heart Study; GERAD, Genetic and Environmental Risk for Alzheimer's disease; GSE15745, dataset from Johns Hopkins University and Miami Brain Bank; GSE15222, dataset from 20 National Alzheimer's Coordinating Center brain banks and the Miami Brain Bank; GSE5281, dataset from Washington University, Duke University and Sun Health Research Institute; IGAP, International genomics of Alzheimer's project; LOAD, Late onset Alzheimer's disease; NA, not applicable; NACC, National Alzheimer's Coordinating Center; NIA-ADC, National institute of aging Alzheimer's disease centers; nP, not used for PRS construction; P, used for PRS construction; ROSMAP, Religious Order Study/Memory and Aging Project; WHICAP, Washington Heights-Inwood Community Aging Project; UKBEC, United Kingdom Brain Expression Consortium

## Supplementary Material - References

- 1 Bertram L, Tanzi RE. The genetics of Alzheimer's disease. *Prog Mol Biol Transl Sci* 2012; 107: 79–100.
- 2 Gómez-Tortosa E, Ruggiero M, Sainz MJ, et al. SORL1 Variants in Familial Alzheimer's Disease. *J Alzheimers Dis* 2018; 61: 1275–81.
- 3 Guerreiro R, Brás J, Hardy J. SnapShot: Genetics of Alzheimer's Disease. *Cell* 2013; 155: 968–968.e1.
- 4 Harold D, Abraham R, Hollingworth P, et al. Genome-wide association study identifies variants at CLU and PICALM associated with Alzheimer's disease. *Nat Genet* 2009; 41: 1088–93.
- 5 Hollingworth P, Harold D, Sims R, et al. Common variants at ABCA7, MS4A6A/MS4A4E, EPHA1, CD33 and CD2AP are associated with Alzheimer's disease. *Nat Genet* 2011; 43: 429–35.
- 6 Kunkle BW, Grenier-Boley B, Sims R, et al. Meta-analysis of genetic association with diagnosed Alzheimer's disease identifies novel risk loci and implicates Abeta, Tau, immunity and lipid processing. *bioRxiv*. 2018; : 294629.
- 7 Lambert J-C, Carla A Ibrahim-Verbaas, Denise Harold, Adam C Naj, Rebecca Sims, Céline Bellenguez, Gyungah Jun, Anita L DeStefano, Joshua C Bis, Gary W Beecham, Benjamin Grenier-Boley, Giancarlo Russo, Tricia A Thornton-Wells, Nicola Jones, Albert V Smith, Vincent Chouraki, Charlene Thomas, M Arfan Ikram, Diana Zelenika, Badri N Vardarajan, Yoichiro Kamatani, Chiao-Feng Lin, Amy Gerrish, Helena Schmidt, Brian Kunkle, Melanie L Dunstan, Agustin Ruiz, Marie-Thérèse Bihoreau, Seung-Hoan Choi, Christiane Reitz<sup>7</sup>, Florence Pasquier, Paul Hollingworth, Alfredo Ramirez, Olivier Hanon, Annette L Fitzpatrick, Joseph D Buxbaum, Dominique Campion, Paul K Crane, Clinton Baldwin, Tim Becker, Vilmundur Gudnason, Carlos Cruchaga, David Craig, Najaf Amin, Claudine Berr, Oscar L Lopez, Philip L De Jager, Vincent Deramecourt, Janet A Johnston, Denis Evans, Simon Lovestone, Luc Letenneur, Francisco J Morón, David C Rubinsztein, Gudny Eiriksdottir, Kristel Slegers, Alison M Goate, Nathalie Fiévet, Matthew J Huentelman, Michael Gill, Kristelle Brown, M Ilyas Kamboh, Lina Keller, Pascale Barberger-Gateau, Bernadette McGuinness, Eric B Larson, Robert Green, Amanda J Myers, Carole Dufouil, Stephen Todd, David Wallon, Seth Love, Ekaterina Rogaeva, John Gallacher, Peter St George-Hyslop, Jordi Clarimon, Alberto Lleó, Anthony Bayer, Debby W Tsuang, Lei Yu, Magda Tsolaki, Paola Bossù, Gianfranco Spalletta, Petroula Proitsi, John Collinge, Sandro Sorbi, Florentino Sanchez-Garcia, Nick C Fox, John Hardy, Maria Candida Deniz Naranjo, Paolo Bosco, Robert Clarke, Carol Brayne, Daniela Galimberti, Michelangelo Mancuso, Fiona Matthews, European

Alzheimer's Disease Initiative (EADI), Genetic and Environmental Risk in Alzheimer's Disease (GE RAD), Alzheimer's Disease Genetic Consortium (ADGC ), Cohorts for Heart and Aging Research in Genomic Epidemiology (CHARGE ), Susanne Moebus, Patrizia Mecocci, Maria Del Zompo, Wolfgang Maier, Harald Hampel, Alberto Pilotto, Maria Bullido, Francesco Panza, Paolo Caffarra, Benedetta Nacmias, John R Gilbert, Manuel Mayhaus, Lars Lannfelt, Hakon Hakonarson, Sabrina Pichler, Minerva M Carrasquillo, Martin Ingelsson, Duane Beekly, Victoria Alvarez, Fanggeng Zou, Otto Valladares, Steven G Younkin, Eliecer Coto, Kara L Hamilton-Nelson, Wei Gu, Cristina Razquin, Pau Pastor, Ignacio Mateo, Michael J Owen, Kelley M Faber, Palmi V Jonsson, Onofre Combarros, Michael C O'Donovan, Laura B Cantwel, Hilkka Soininen, Deborah Blacker, Simon Mead, Thomas H Mosley Jr, David A Bennett, Tamara B Harris, Laura Fratiglioni, Clive Holmes, Renee F A G de Bruijn, Peter Passmore, Thomas J Montine, Karolien Bettens, Jerome I Rotter, Alexis Brice, Kevin Morgan, Tatiana M Foroud, Walter A Kukull, Didier Hannequin, John F Powel, Michael A Nalls, Karen Ritchie, Kathryn L Lunetta, John S K Kauwe, Eric Boerwinkle, Matthias Riemenschneider, Mercè Boada, Mikko Hiltunen, Eden R Martin, Reinhold Schmidt, Dan Rujescu, Li-San Wang, Jean-François Dartigues, Richard Mayeux, Christophe Tzourio, Albert Hofman, Markus M Nöthen, Caroline Graff, Bruce M Psaty, Lesley Jones, Jonathan L Haines, Peter A Holmans, Mark Lathrop, Margaret A Pericak-Vance, Lenore J Launer, Lindsay A Farrer, Cornelia M van Duijn, Christine Van Broeckhoven, Valentina Moskvina, Sudha Seshadri, Julie Williams, Gerard D Schellenberg & Philippe Amouyel. Meta-analysis of 74,046 individuals identifies 11 new susceptibility loci for Alzheimer's disease. *Nat Genet* 2013; 45: 1452–8.

- 8 Medway C, Morgan K. The genetics of Alzheimer's disease; putting flesh on the bones. *NeuroPathol Appl Neurobiol* 2014; 40: 97–105.
- 9 Reitz C. Genetic diagnosis and prognosis of Alzheimer's disease: challenges and opportunities. *Expert Rev Mol Diagn* 2015; 15: 339–48.
